# Supplementary material for: mTOR controls lysosome tubulation and antigen presentation in macrophages and dendritic cells
Source: PubMed Central journal article supplement — Mol Biol Cell. 2016 Jan 15;27(2):321–33. doi: 10.1091/mbc.E15-05-0272 (PMC4713134; doi:10.1091/mbc.e15-05-0272), 2016-01-15

# Supplemental Materials

*Molecular Biology of the Cell*

Saric et al.

**Supplementary Figure 1.** MRT67307, IRAK1/4 inhibitor and Pepinh-MYD inhibit pathways downstream of their targets. (A) Western blot of RAW whole-cell lysates from conditions indicated above the lanes. Note that LPS induces phospho-IRF3, while pre-treatment with the TBK1 inhibitor MRT67307 followed by LPS stimulation blocked phosphorylation of IRF3, the downstream substrate of TBK1. GAPDH was probed as a loading control. (B) Relative expression of IL6 mRNA in RAW cells treated with DMSO as control or pre-treated for 20 min with DMSO or IRAK1/4 inhibitor followed by 2 h LPS. Note the strong induction of IL6 transcription with LPS and the block in IL6 transcription with the IRAK1/4 inhibitor. Data are mean  $\pm$  SEM from 3 individual experiments where expression is relative to LPS condition (C) Western blot of RAW whole-cell lysates. Cells were incubated with either Pepinh-ctrl or Pepinh-MYD for 3 h followed by LPS stimulation for 2 h. MyD88 inhibition with Pepinh-MYD strongly blocks phosphorylation of Akt in response to LPS. GAPDH was probed as a loading control.

**Supplementary Figure 2.** mTOR activity is required for lysosome tubulation. (A) Multiple mTOR inhibitors block lysosome tubulation. Quantification of lysosome tubulation in RAW cells either treated with DMSO as control or pre-treated for 20 min with DMSO, 1  $\mu$ M rapamycin, 200 nM PP242 or 50 nM WYE687 followed by 100 ng/mL LPS for 2 h to induce lysosome tubulation. Data are mean  $\pm$  SEM of three independent experiments based on 25-30 cells per condition per experiment. Data was statistically analysed using a one-way ANOVA, followed by Tukey's post-hoc test. An asterisk (\*) indicates a significant difference ( $p < 0.0001$ ) between DMSO+LPS and DMSO alone. (B) Western blot of RAW whole-cell lysates showing that siRNA suppresses mTOR protein levels by at least 60% (simTOR) relative to non-targeting siRNA oligonucleotides (siNTP). GAPDH was probed as a loading control. (C) Western blot of RAW whole-cell lysates showing that treatment of RAW cells with 100  $\mu$ M of the AMPK activator A769662 inhibits mTOR. Note the lack of pS6K in A769662 + LPS condition. Total S6K was probed as a loading control.

**Supplementary Figure 3.** mTOR inhibition does not affect microtubules or basal lysosomal motility. (A) Microtubules of RAW cells were stained by immunofluorescence using antibodies against  $\alpha$ -tubulin. Cells were either untreated, treated with 100 ng/mL LPS or 100 nM torin1 or both for 2 hours. (B) Lysosome track length was manually followed in control (DMSO) and torin1-treated cells over a period of 1 min and then the lysosome speed was calculated. Each dot is an individual lysosome, with a total of 55 and 44 lysosomes from 15 cells across three independent experiments. We could not observe a difference in resting lysosome motility between control and mTOR-inhibited cells.

# Supplementary Figure 1

**A**

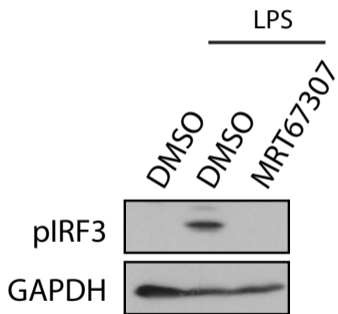

**B**

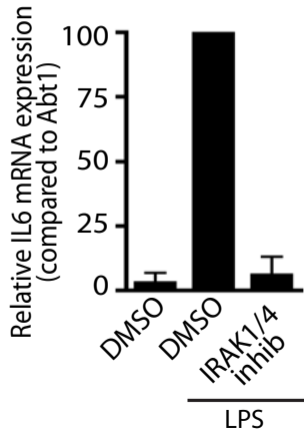

**C**

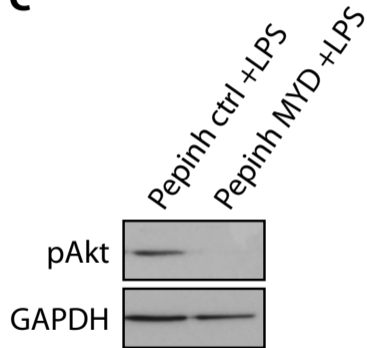

## Supplementary Figure 2

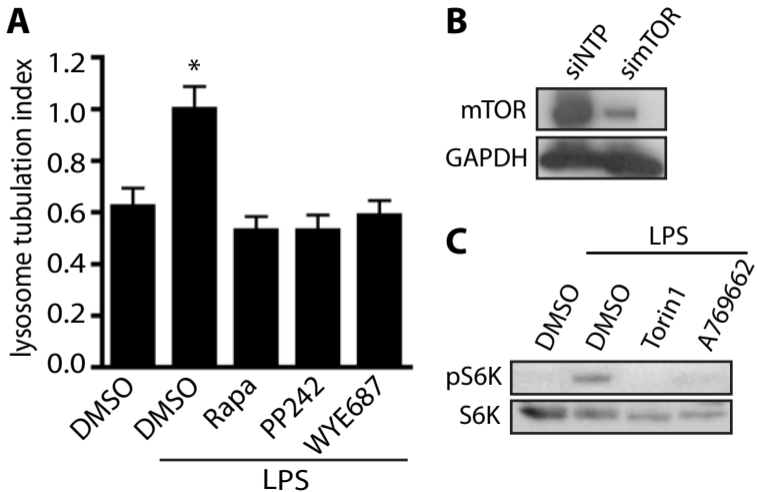

# Supplementary Figure 3

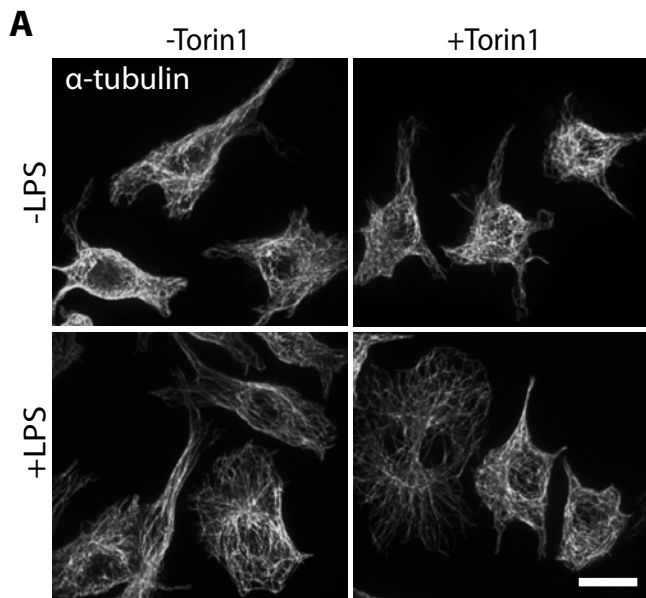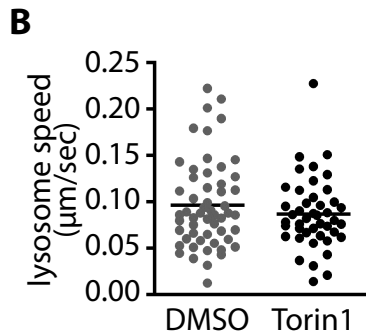

Supplement: supp_E15-05-0272v1_CombinedSupMats.pdf [file supp_E15-05-0272v1_CombinedSupMats.pdf]
